# Supplementary material for: Central Arctic Ocean paleoceanography from ∼ 50 ka to present, on the basis of ostracode faunal assemblages from the SWERUS 2014 expedition
Source: Copernicus journal article supplement (doi:10.5194/cp-13-1473-2017), 2017-11-03
Supplement: Supplementary file 1 [file cp-13-1473-2017-supplement.zip]

Archive with 2 entries (2 files):
- Gemery-SuppTableS4-32GC2-32MC.xlsx
- cp-13-1473-2017-supplement-title-page.pdf
