# Supplementary material for: Central Arctic Ocean paleoceanography from ∼ 50 ka to present, on the basis of ostracode faunal assemblages from the SWERUS 2014 expedition
Source: Copernicus journal article supplement (doi:10.5194/cp-13-1473-2017), 2017-11-03
Supplement: Supplementary file 1 [file cp-13-1473-2017-supplement.zip › cp-13-1473-2017-supplement-title-page.pdf]

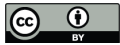

## *Supplement of*

# **Central Arctic Ocean paleoceanography from ~ 50 ka to present, on the basis of ostracode faunal assemblages from the SWERUS 2014 expedition**

**Laura Gemery et al.**

*Correspondence to:* Laura Gemery ([lgemery@usgs.gov](mailto:lgemery@usgs.gov))

- [cp-13-1473-2017-supplement-title-page.pdf](#)
- [Gemery-SuppTableS4-32GC2-32MC.xlsx](#)

The copyright of individual parts of the supplement might differ from the CC BY 3.0 License.
