# Supplementary material for: Central Arctic Ocean paleoceanography from ∼ 50 ka to present, on the basis of ostracode faunal assemblages from the SWERUS 2014 expedition
Source: Copernicus journal article supplement (doi:10.5194/cp-13-1473-2017), 2017-11-03
Supplement: Supplementary file 1 [file cp-13-1473-2017-supplement.zip › Gemery-SuppTableS4-32GC2-32MC.xlsx]

## Sheet: S1-32-MUC4 counts
32-MC4	cm (top to bottom)	Acanthocythereis dunelmensis (Norman 1869) sensu lato	Acetabulastoma arcticum Schornikov 1970	Argilloecia spp.	Baffinicythere howei Hazel 1967	Bythocythere constricta Sars 1866	Bythoceratina scaberrima (Brady 1887)	Cluthia cluthae (Brady, Crosskey & Robertson 1874)	Cluthia whatleyi Yasuhara, Stepanova, Okahashi, Cronin and Brouwers 2014	Cythere lutea Müller 1785	Cytheretta teshekpukensis Swain 1963	Cytheromorpha macchesneyi (Brady and Crosskey 1871)	Cytheropteron angulatum Brady and Robertson 1872	Cytheropteron arcticum Neale and Howe 1973	Cytheropteron arcuatum Brady, Crosskey & Robertson 1874	Cytheropteron biconvexa Whatley and Masson 1979	Cytheropteron champlainum Cronin 1981	Cytheropteron elaeni Cronin 1989	Cytheropteron excavoalatum Whatley and Masson 1979	Cytheropteron higashikawai Ishizaki 1981	Cytheropteron inflatum Brady, Crosskey & Robertson 1874	Cytheropteron laptevensis Stepanova 2004	Cytheropteron latissimum (Norman 1865)	Cytheropteron montrosiense Brady, Crosskey & Robertson 1874	Cytheropteron nodosoalatum Neale and Howe 1973	Cytheropteron nodosum Brady 1868	Cytheropteron parahamatum Yasuhara, Stepanova, Okahashi, Cronin and Brouwers 2014	Cytheropteron paralatissimum Swain 1963	Cytheropteron pararcticum Whatley and Masson 1979	Cytheropteron perlaria Hao 1988	Cytheropteron porterae Whatley and Coles 1987	Cytheropteron pseudoinflatum Whatley and Eynon 1996	Cytheropteron pseudomontrosiense Whatley and Masson 1979	Cytheropteron pyramidale Brady 1868	Cytheropteron scoresbyi Whatley and Eynon 1996	Cytheropteron sedovi Schneider 1969	Cytheropteron sulense Lev 1972	Cytheropteron suzdalskyi Lev 1972	Cytheropteron tumefactum Lev 1972	Cytheropteron spp.	Elofsonella concinna (Jones 1857)	Elofsonella neoconcinna Bassiouni 1965	Eucythere argus (Sars 1866)	Eucythere declivis (Norman 1865)	Eucythere sp.	Eucytherurua delineata Whatley and Eynon 1996	Finmarchinella angulata (Sars 1866)	Finmarchinella barentzovoensis (Mandelstam 1957)	Finmarchinella finmarchica (Sars 1866)
32-MC4	0-1		56	4		26	0		46											12							11								81	3				1
32-MC4	1-2		58	2		14	0		41						1					2							6								55	0
32-MC4	2-3		50	8		13	0		77											8							15								101	0
32-MC4	3-4		43	9		13	0		70											12							23								68	0
32-MC4	4-5		46	28		7	0		54											12							39								142	0									1
32-MC4	5-6		48	57		18	0		12		1									7							53								118	0
32-MC4	6-7		10	21		7	0		19											5							20								35	1
32-MC4	7-8		15	17		9	0		42											6							33								47	1
32-MC4	8-9		10	15		2	0		23											7							24								28	0
32-MC4	9-10		8	6		5	0		10			1								8							44								38	0
32-MC4	10-11		4	12		0	0		16											8							75								26	0
32-MC4	11-12		2	10		2	0		4			2								15							69								56	2
32-MC4	12-13		1	22		4	0		0			2								17							56								60	5
32-MC4	13-14		2	6		5	2		0			1								11							33								31	9
32-MC4	14-15		3	7		2	1		0			1								3							15								27	7
32-MC4	15-16		1	10		4	1		0											10							12								28	19
32-MC4	16-17		1	4		11	0		0											2							10								19	40
32-MC4	17-18		9	3		24	0		1											9							10								40	102				1
32-MC4	18-19		5	1		5	0		0											2							3								29	51				1
32-MC4	19-20		16	0		8	2		0			1								4							0								19	36
32-MC4	20-21		10	1		9	0		0											7							7								53	37
32-MC4	21-22		5	1		13	1		0											2							6								33	37
32-MC4	22-23		7	1		18	1		0											0							2								51	58
32-MC4	23-24		2	0		21	3		1											2							0								28	39
32-MC4	24-25		27	0		19	6		0											3	1						3								85	82				1
32-MC4	25-26		14	0		20	0		0											0							2								53	46				2
32-MC4	26-27		7	0		8	0		0											0							0								28	47				1
32-MC4	27-28		9	0		7	1		0											2															38	54									1
32-MC4	28-29		23	0		11	2		0											0							0								26	55
32-MC4	29-30		23	1		0	1		0											0							2								28	58									1
32-MC4	30-31		68	0		10	3		3											0							0								27	115		2
32-MC4	31-32		15	0		4	0		2											0							0								8	40									1
[truncated: 154 more columns]

## Sheet: S2 32-GC2 counts
32-GC	Section	cm (top)	cm (base)	NOTES	Acanthocythereis dunelmensis (Norman 1869) sensu lato	Acetabulastoma arcticum Schornikov 1970	Argilloecia spp.	Baffinicythere howei Hazel 1967	Bythocythere constricta Sars 1866	Bythoceratina scaberrima (Brady 1887)	Cluthia cluthae (Brady, Crosskey & Robertson 1874)	Cluthia whatleyi Yasuhara, Stepanova, Okahashi, Cronin and Brouwers 2014	Cythere lutea Müller 1785	Cytheretta teshekpukensis Swain 1963	Cytheromorpha macchesneyi (Brady and Crosskey 1871)	Cytheropteron angulatum Brady and Robertson 1872	Cytheropteron arcticum Neale and Howe 1973	Cytheropteron arcuatum Brady, Crosskey & Robertson 1874	Cytheropteron biconvexa Whatley and Masson 1979	Cytheropteron champlainum Cronin 1981	Cytheropteron elaeni Cronin 1989	Cytheropteron excavoalatum Whatley and Masson 1979	Cytheropteron higashikawai Ishizaki 1981	Cytheropteron inflatum Brady, Crosskey & Robertson 1874	Cytheropteron laptevensis Stepanova 2004	Cytheropteron latissimum (Norman 1865)	Cytheropteron montrosiense Brady, Crosskey & Robertson 1874	Cytheropteron nodosoalatum Neale and Howe 1973	Cytheropteron nodosum Brady 1868	Cytheropteron parahamatum Yasuhara, Stepanova, Okahashi, Cronin and Brouwers 2014	Cytheropteron paralatissimum Swain 1963	Cytheropteron pararcticum Whatley and Masson 1979	Cytheropteron perlaria Hao 1988	Cytheropteron porterae Whatley and Coles 1987	Cytheropteron pseudoinflatum Whatley and Eynon 1996	Cytheropteron pseudomontrosiense Whatley and Masson 1979	Cytheropteron pyramidale Brady 1868	Cytheropteron scoresbyi Whatley and Eynon 1996	Cytheropteron sedovi Schneider 1969	Cytheropteron sulense Lev 1972	Cytheropteron suzdalskyi Lev 1972	Cytheropteron tumefactum Lev 1972	Cytheropteron spp.	Elofsonella concinna (Jones 1857)	Elofsonella neoconcinna Bassiouni 1965	Eucythere argus (Sars 1866)	Eucythere declivis (Norman 1865)	Eucythere sp.	Eucytherurua delineata Whatley and Eynon 1996
SWERUS-L2-32-GC2	1	5	7			6			2			8																		1								8
SWERUS-L2-32-GC2	1	8	10			2			2			5																										13
SWERUS-L2-32-GC2	1	10	12																											4
SWERUS-L2-32-GC2	1	13	15			2	3					1											1							16								5	1
SWERUS-L2-32-GC2	1	15	17			1	8		4	4													4							11								40	8
SWERUS-L2-32-GC2	1	17	19																				1							9								15	13
SWERUS-L2-32-GC2	1	20	22			4			2														2							2								12	10
SWERUS-L2-32-GC2	1	23	25			1	1		13	1																												22	23
SWERUS-L2-32-GC2	1	27	29			17			21	4		1											2							11								71	78
SWERUS-L2-32-GC2	1	30	32			3			1			2																		1								14	25
SWERUS-L2-32-GC2	1	33	35			25			3			5											1															23	89									1
SWERUS-L2-32-GC2	1	35	37			15			3	1		6																		1								34	50									2
SWERUS-L2-32-GC2	1	38	40			20			2			4											1							2								32	50									3
SWERUS-L2-32-GC2	1	40	42			2						7																										5	0
SWERUS-L2-32-GC2	1	43	45			0																								7								15	0									4
SWERUS-L2-32-GC2	1	47	49
SWERUS-L2-32-GC2	1	50	52																																			3
SWERUS-L2-32-GC2	1	53	55																											2								21					3
SWERUS-L2-32-GC2	1	55	57		1	1			1	1													1							7								11	4
SWERUS-L2-32-GC2	1	58	60																																			4	1
SWERUS-L2-32-GC2	1	60	62																																			3
SWERUS-L2-32-GC2	1	63	65
SWERUS-L2-32-GC2	1	67	69	Barren, All sand
SWERUS-L2-32-GC2	1	70	72	Barren, All sand; no calcareous
SWERUS-L2-32-GC2	1	73	75	Barren, Fine sand; no calcareous
SWERUS-L2-32-GC2	1	75	77	Barren, Fine, red sand; no calcareous
SWERUS-L2-32-GC2	1	78	80	Barren, Dark sand; no calcareous
SWERUS-L2-32-GC2	1	80	82	Barren,All sand; no calcareous
SWERUS-L2-32-GC2	1	83	85	Barren, Dark reddish sand; no calcareous
SWERUS-L2-32-GC2	1	87	89	Barren, All sand; no calcareous
SWERUS-L2-32-GC2	1	90	92	Barren, Sand with rock fragments; no calcareous
SWERUS-L2-32-GC2	1	93	95	Barren, All sand; no calcareous
SWERUS-L2-32-GC2	1	95	97	Barren, Sand with small rock fragments; no calcareous
SWERUS-L2-32-GC2	1	98	100	Barren, Fine sand, no calcareous
SWERUS-L2-32-GC2	1	100	102	Barren, All sand; no calcareous
SWERUS-L2-32-GC2	1	102	104	Barren, Sand with some rock fragments; no calcareous
SWERUS-L2-32-GC2	2	35	37	Barren, Fine sand with rock fragments; no calcareous
SWERUS-L2-32-GC2	2	55	57	Barren, Fine sand with small rock fragments; no calcareous
SWERUS-L2-32-GC2	2	95	97	Barren, All sand; no calcareous
SWERUS-L2-32-GC2	2	115	117	Barren, All sand; no calcareous
			2314
[truncated: 162 more columns]

## Sheet: S3-v32GC &32MUC %abundance
32-GC	Section	cm (top)	cm (base)	Avg depth	ADJUSTED DEPTH based on MUC MINUS 3cm	New calibrated Age from Christof 8-2016	Total Count	PERCENT	Acanthocythereis dunelmensis (Norman 1869) sensu lato	Acetabulastoma arcticum Schornikov 1970	Argilloecia spp.	Baffinicythere howei Hazel 1967	Bythocythere constricta Sars 1866	Bythoceratina scaberrima (Brady 1887)	Cluthia cluthae (Brady, Crosskey & Robertson 1874)	Cluthia whatleyi Yasuhara, Stepanova, Okahashi, Cronin and Brouwers 2014	Cythere lutea MŸller 1785	Cytheretta teshekpukensis Swain 1963	Cytheromorpha macchesneyi (Brady and Crosskey 1871)	Cytheropteron angulatum Brady and Robertson 1872	Cytheropteron arcticum Neale and Howe 1973	Cytheropteron arcuatum Brady, Crosskey & Robertson 1874	Cytheropteron biconvexa Whatley and Masson 1979	Cytheropteron champlainum Cronin 1981	Cytheropteron elaeni Cronin 1989	Cytheropteron excavoalatum Whatley and Masson 1979	Cytheropteron higashikawai Ishizaki 1981	Cytheropteron inflatum Brady, Crosskey & Robertson 1874	Cytheropteron laptevensis Stepanova 2004	Cytheropteron latissimum (Norman 1865)	Cytheropteron montrosiense Brady, Crosskey & Robertson 1874	Cytheropteron nodosoalatum Neale and Howe 1973	Cytheropteron nodosum Brady 1868	Cytheropteron parahamatum Yasuhara, Stepanova, Okahashi, Cronin and Brouwers 2014	Cytheropteron paralatissimum Swain 1963	Cytheropteron pararcticum Whatley and Masson 1979	Cytheropteron perlaria Hao 1988	Cytheropteron porterae Whatley and Coles 1987	Cytheropteron pseudoinflatum Whatley and Eynon 1996	Cytheropteron pseudomontrosiense Whatley and Masson 1979	Cytheropteron pyramidale Brady 1868	Cytheropteron scoresbyi Whatley and Eynon 1996	Cytheropteron sedovi Schneider 1969	Cytheropteron sulense Lev 1972	Cytheropteron suzdalskyi Lev 1972	Cytheropteron tumefactum Lev 1972	Cytheropteron spp.	Elofsonella concinna (Jones 1857)	Elofsonella neoconcinna Bassiouni 1965
SWERUS-L2-32-GC2	1	5	7	6	3	3.6361	52		0	11.5385	0	0	3.84615	0	0	15.3846	0	0	0	0	0	0	0	0	0	0	0	0	0	0	0	0	0	1.92308	0	0	0	0	0	0	0	15.3846	0	0	0	0	0	0	0
SWERUS-L2-32-GC2	1	8	10	9	6	8.04	59		0	3.38983	0	0	3.38983	0	0	8.47458	0	0	0	0	0	0	0	0	0	0	0	0	0	0	0	0	0	0	0	0	0	0	0	0	0	22.0339	0	0	0	0	0	0	0
SWERUS-L2-32-GC2	1	10	12	11	8	8.316	22		0	0	0	0	0	0	0	0	0	0	0	0	0	0	0	0	0	0	0	0	0	0	0	0	0	18.1818	0	0	0	0	0	0	0	0	0	0	0	0	0	0	0
SWERUS-L2-32-GC2	1	13	15	14	11	11.2561	82		0	2.43902	3.65854	0	0	0	0	1.21951	0	0	0	0	0	0	0	0	0	0	1.21951	0	0	0	0	0	0	19.5122	0	0	0	0	0	0	0	6.09756	1.21951	0	0	0	0	0	0
SWERUS-L2-32-GC2	1	15	17	16	13	12.1053	495		0	0.20202	1.61616	0	0.808081	0.808081	0	0	0	0	0	0	0	0	0	0	0	0	0.808081	0	0	0	0	0	0	2.22222	0	0	0	0	0	0	0	8.08081	1.61616	0	0	0	0	0	0
SWERUS-L2-32-GC2	1	17	19	18	15	13.3058	366		0	0	0	0	0	0	0	0	0	0	0	0	0	0	0	0	0	0	0.273224	0	0	0	0	0	0	2.45902	0	0	0	0	0	0	0	4.09836	3.55191	0	0	0	0	0	0
SWERUS-L2-32-GC2	1	20	22	21	18	18.8597	187		0	2.13904	0	0	1.06952	0	0	0	0	0	0	0	0	0	0	0	0	0	1.06952	0	0	0	0	0	0	1.06952	0	0	0	0	0	0	0	6.41711	5.34759	0	0	0	0	0	0
SWERUS-L2-32-GC2	1	23	25	24	21	24.8725	474		0	0.21097	0.21097	0	2.74262	0.21097	0	0	0	0	0	0	0	0	0	0	0	0	0	0	0	0	0	0	0	0	0	0	0	0	0	0	0	4.64135	4.85232	0	0	0	0	0	0
SWERUS-L2-32-GC2	1	27	29	28	25	32.9361	1147		0	1.48213	0	0	1.83086	0.348736	0	0.087184	0	0	0	0	0	0	0	0	0	0	0.174368	0	0	0	0	0	0	0.959024	0	0	0	0	0	0	0	6.19006	6.80035	0	0	0	0	0	0
SWERUS-L2-32-GC2	1	30	32	31	28	36.0151	186		0	1.6129	0	0	0.537634	0	0	1.07527	0	0	0	0	0	0	0	0	0	0	0	0	0	0	0	0	0	0.537634	0	0	0	0	0	0	0	7.52688	13.4409	0	0	0	0	0	0
SWERUS-L2-32-GC2	1	33	35	34	31	39.0941	558		0	4.48029	0	0	0.537634	0	0	0.896057	0	0	0	0	0	0	0	0	0	0	0.179211	0	0	0	0	0	0	0	0	0	0	0	0	0	0	4.12186	15.9498	0	0	0	0	0	0
SWERUS-L2-32-GC2	1	35	37	36	33	42.4276	591		0	2.53807	0	0	0.507614	0.169205	0	1.01523	0	0	0	0	0	0	0	0	0	0	0	0	0	0	0	0	0	0.169205	0	0	0	0	0	0	0	5.75296	8.46024	0	0	0	0	0	0
SWERUS-L2-32-GC2	1	38	40	39	36	46.3919	508		0	3.93701	0	0	0.393701	0	0	0.787402	0	0	0	0	0	0	0	0	0	0	0.19685	0	0	0	0	0	0	0.393701	0	0	0	0	0	0	0	6.29921	9.84252	0	0	0	0	0	0
SWERUS-L2-32-GC2	1	40	42	41	38	49.0347	126		0	1.5873	0	0	0	0	0	5.55556	0	0	0	0	0	0	0	0	0	0	0	0	0	0	0	0	0	0	0	0	0	0	0	0	0	3.96825	0	0	0	0	0	0	0
SWERUS-L2-32-GC2	1	43	45	44	41	52.999	191		0	0	0	0	0	0	0	0	0	0	0	0	0	0	0	0	0	0	0	0	0	0	0	0	0	3.66492	0	0	0	0	0	0	0	7.8534	0	0	0	0	0	0	0
SWERUS-L2-32-GC2	1	47	49	48	45	58.2847	31		0	0	0	0	0	0	0	0	0	0	0	0	0	0	0	0	0	0	0	0	0	0	0	0	0	0	0	0	0	0	0	0	0	0	0	0	0	0	0	0	0
SWERUS-L2-32-GC2	1	50	52	51	48	62.2489	40		0	0	0	0	0	0	0	0	0	0	0	0	0	0	0	0	0	0	0	0	0	0	0	0	0	0	0	0	0	0	0	0	0	7.5	0	0	0	0	0	0	0
SWERUS-L2-32-GC2	1	53	55	54	51	66.2132	113		0	0	0	0	0	0	0	0	0	0	0	0	0	0	0	0	0	0	0	0	0	0	0	0	0	1.76991	0	0	0	0	0	0	0	18.5841	0	0	0	0	2.65487	0	0
SWERUS-L2-32-GC2	1	55	57	56	53	68.856	75		1.33333	1.33333	0	0	1.33333	1.33333	0	0	0	0	0	0	0	0	0	0	0	0	1.33333	0	0	0	0	0	0	9.33333	0	0	0	0	0	0	0	14.6667	5.33333	0	0	0	0	0	0
SWERUS-L2-32-GC2	1	58	60	59	56	72.8203	11		0	0	0	0	0	0	0	0	0	0	0	0	0	0	0	0	0	0	0	0	0	0	0	0	0	0	0	0	0	0	0	0	0	36.3636	9.09091	0	0	0	0	0	0
SWERUS-L2-32-GC2	1	60	62	61	58	75.4632	15		0	0	0	0	0	0	0	0	0	0	0	0	0	0	0	0	0	0	0	0	0	0	0	0	0	0	0	0	0	0	0	0	0	20	0	0	0	0	0	0	0
SWERUS-L2-32-GC2	1	63	65
NOTE: For the GC ages, I subtracted 3 from the depth and used the muc dates that aligned with that interval
[truncated: 101 more columns]

## Sheet: S4- 32MUC4 confidence limits
	interval	avg depth	AGE (ka)	Acetabulastoma arcticum Schornikov 1970	Argilloecia spp.	Bythocythere constricta Sars 1866	Bythoceratina scaberrima (Brady 1887)	Cluthia cluthae (Brady, Crosskey & Robertson 1874)	Cluthia whatleyi Yasuhara, Stepanova, Okahashi, Cronin and Brouwers 2014	Cytheretta teshekpukensis Swain 1963	Cytheromorpha macchesneyi (Brady and Crosskey 1871)	Cytheropteron arcuatum Brady, Crosskey & Robertson 1874	Cytheropteron higashikawai Ishizaki 1981	Cytheropteron inflatum Brady, Crosskey & Robertson 1874	Cytheropteron parahamatum Yasuhara, Stepanova, Okahashi, Cronin and Brouwers 2014	Cytheropteron scoresbyi Whatley and Eynon 1996	Cytheropteron sedovi Schneider 1969	Cytheropteron suzdalskyi Lev 1972	Cytheropteron spp.	Cytheropteron TOTAL	Eucythere sp.	Eucytherurua delineata Whatley and Eynon 1996	Heterocyprideis fascis (Brady and Norman 1889)	Heterocyprideis sorbyana (Jones 1857)	Krithe hunti Yasuhara, Stepanova, Okahashi, Cronin and Brouwers 2014	Krithe minima Coles, Whatley, & Moguilevsky 1994	Microcythere medistriata (Joy and Clark 1977)	Paracytherois spp.	Pedicythere spp.	Polycope spp.	Propontocypris sp.	Pseudocythere caudata Sars 1866	Rabilimis mirabilis (Brady 1868)	Sarsicytheridea bradii (Norman 1865)	Sclerochilus spp.	Semicytherura complanata (Brady, Crosskey & Robertson 1874)	Semicytherura spp.	Other	Indeterminate/IRO	Total	Total species count	Confidence limits	Acetabulastoma arcticum Schornikov 1970	Argilloecia spp.	Bythocythere constricta Sars 1866	Bythoceratina scaberrima (Brady 1887)	Cluthia cluthae (Brady, Crosskey & Robertson 1874)	Cluthia whatleyi Yasuhara, Stepanova, Okahashi, Cronin and Brouwers 2014	Cytheretta teshekpukensis Swain 1963
32-MC4	0-1	0.5	0.5745	6.48148	0.462963	3.00926	0	0	5.32407	0	0	0	1.38889	0	1.27315	9.375	0.347222	0	0.115741	12.5	0	0	0	0	1.38889	0	0.694444	0.925926	0.347222	58.4491	1.38889	1.50463	6.8287	0	0	0	0	0.694444	0	100	864		1.64167	0.452652	1.13918	0	0	1.49707	0
32-MC4	1-2	1.5	1.6882	11.0057	0.379507	2.65655	0	0	7.77989	0	0	0.189753	0.379507	0	1.13852	10.4364	0	0	0	12.1442	0	0	0	0	2.08729	0	0.759013	3.60531	0	50.4744	0.56926	0.56926	7.77989	0	0	0	0	0.189753	0	100	527		2.67203	0.52497	1.37298	0	0	2.28692	0
32-MC4	2-3	2.5	2.8018	8.66551	1.38648	2.25303	0	0	13.3449	0	0	0	1.38648	0	2.59965	17.5043	0	0	0	21.4905	0	0	0	0	2.07972	0	0.17331	6.7591	1.03986	29.2894	1.7331	1.55979	9.01213	0	0	0	0	1.21317	0	100	577		2.29553	0.954099	1.21089	0	0	2.77474	0
32-MC4	3-4	3.5	4.4705	8.72211	1.82556	2.63692	0	0	14.1988	0	0	0	2.43408	0	4.66531	13.7931	0	0	0	20.8925	0	0	0	0	1.0142	0	0.811359	8.11359	0.40568	24.1379	0.40568	1.0142	15.4158	0	0	0	0	0.40568	0	100	493		2.49073	1.18176	1.41442	0	0	3.08109	0
32-MC4	4-5	4.5	6.1393	7.97227	4.85269	1.21317	0	0	9.35875	0	0	0	2.07972	0	6.7591	24.6101	0	0	0	33.391	0.17331	0	0	0	2.42634	0	0	5.19931	0.17331	14.2114	1.38648	1.90641	16.8111	0	0	0	0	0.866551	0	100	577		2.21013	1.75331	0.893262	0	0	2.37651	0
32-MC4	5-6	5.5	7.971	7.03812	8.35777	2.6393	0	0	1.75953	0.146628	0	0	1.02639	0	7.77126	17.3021	0	0	0	26.0997	0	0	0	0	3.07918	0	0.146628	7.33138	0.879765	17.7419	0.146628	0.879765	23.1672	0.146628	0	0	0	0.439883	0	100	682		1.91975	2.0771	1.20309	0	0	0.986751	0.287179
32-MC4	6-7	6.5	8.109	3.31126	6.95364	2.31788	0	0	6.29139	0	0	0	1.65563	0	6.62252	11.5894	0.331126	0	0	20.1987	0	0	0	0	7.61589	0	0	6.62252	0.993377	9.93377	0	1.3245	34.4371	0	0	0	0	0	0	100	302		2.01807	2.86885	1.69709	0	0	2.73852	0
32-MC4	7-8	7.5	8.247	4.06504	4.60705	2.43902	0	0	11.3821	0	0	0	1.62602	0	8.94309	12.7371	0.271003	0	0	23.5772	0	0	0	0	6.77507	0.813008	0.271003	6.77507	0.542005	9.21409	0	1.08401	28.4553	0	0	0	0	0	0	100	369		2.01495	2.13901	1.57394	0	0	3.24052	0
32-MC4	8-9	8.5	8.385	3.33333	5	0.666667	0	0	7.66667	0	0	0	2.33333	0	8	9.33333	0	0	0	19.6667	0	0	0	0	7.33333	2	0	2	0	8.66667	0	1.33333	40.6667	0	0	0	0	1.66667	0	100	300		2.0313	2.46628	0.920868	0	0	3.01077	0
32-MC4	9-10	9.5	9.5334	2.65781	1.99336	1.66113	0	0	3.32226	0	0.332226	0	2.65781	0	14.6179	12.6246	0	0	0	29.9003	0	0	0	0	8.9701	0	0	2.65781	0.332226	13.289	0.332226	1.3289	32.8904	0	0	0	0	0.332226	0	100	301		1.81713	1.57904	1.4439	0	0	2.02466	0
32-MC4	10-11	10.5	10.6819	1.30293	3.90879	0	0	0	5.21173	0	0	0	2.60586	0	24.43	8.46906	0	0	0	35.5049	0	0	0	0	5.86319	0	0.325733	6.18893	0.651466	20.5212	1.62866	1.62866	15.9609	0	0	0	0	1.30293	0	100	307		1.26853	2.16795	0	0	0	2.48631	0
32-MC4	11-12	11.5	11.8304	0.505051	2.52525	0.505051	0	0	1.0101	0	0.505051	0	3.78788	0	17.4242	14.1414	0.505051	0	0	35.8586	0	0	0	0	1.0101	0	1.76768	1.76768	2.0202	45.9596	1.0101	2.0202	3.0303	0	0	0	0	0.505051	0	100	396		0.698194	1.54528	0.698194	0	0	0.984887	0
32-MC4	12-13	12.5	12.0136	0.217391	4.78261	0.869565	0	0	0	0	0.434783	0	3.69565	0	12.1739	13.0435	1.08696	0	0	30	0	0	0	0	0	0	2.17391	3.47826	2.17391	48.2609	0.869565	4.56522	2.17391	0	0	0	0	0	0	100	460		0.425624	1.95015	0.848461	0	0	0	0
32-MC4	13-14	13.5	12.1969	0.660066	1.9802	1.65017	0.660066	0	0	0	0.330033	0	3.63036	0	10.8911	10.231	2.9703	0	0	27.7228	0	0	0	0	0.330033	0	4.9505	0.660066	1.9802	48.5149	0.990099	9.57096	0	0	0	0	0	0	0	100	303		0.911781	1.56872	1.43445	0.911781	0	0	0
32-MC4	14-15	14.5	12.3802	0.990099	2.31023	0.660066	0.330033	0	0	0	0.330033	0	0.990099	0	4.9505	8.91089	2.31023	0	0	17.1617	0	0	0	0	0.330033	0	1.32013	3.30033	2.64026	57.4257	0.660066	12.2112	0	0.330033	0	0	0	0	0	100	303		1.11484	1.69156	0.911781	0.645796	0	0	0
32-MC4	15-16	15.5	14.2315	0.257069	2.57069	1.02828	0.257069	0	0	0	0	0	2.57069	0	3.08483	7.19794	4.88432	0	0	17.7378	0	0	0	0	0.514139	0	2.82776	2.05656	2.31362	55.527	0.514139	14.3959	0	0	0	0	0	0	0	100	389		0.503208	1.57272	1.00252	0.503208	0	0	0
32-MC4	16-17	16.5	16.0828	0.333333	1.33333	3.66667	0	0	0	0	0	0	0.666667	0	3.33333	6.33333	13.3333	0	0	23.6667	0	0	0	0	1	0	4	2.66667	0.666667	57.6667	0.333333	4.33333	0.333333	0	0	0	0	0	0	100	300		0.652244	1.29793	2.12676	0	0	0	0
32-MC4	17-18	17.5	17.934	1.44	0.48	3.84	0	0	0.16	0	0	0	1.44	0	1.6	6.4	16.32	0	0.16	25.92	0	0	0	0	0.32	0	2.4	0.8	0	55.84	0	8.8	0	0	0	0	0	0	0	100	625		0.934002	0.541866	1.50653	0	0	0.313349	0
32-MC4	18-19	18.5	19.7853	1.66113	0.332226	1.66113	0	0	0	0	0	0	0.664452	0	0.996678	9.63455	16.9435	0	0.332226	28.5714	0	0	0	0	0.332226	0	5.31561	0.996678	0.332226	59.1362	0.332226	0.996678	0.332226	0	0	0	0	0	0	100	301		1.4439	0.65008	1.4439	0	0	0	0
32-MC4	19-20	19.5	21.6366	5.22876	0	2.61438	0.653595	0	0	0	0.326797	0	1.30719	0	0	6.20915	11.7647	0	0	19.281	0	0	0	0	0.326797	0	2.61438	0	1.63399	65.3595	0	1.63399	0	0	0	0	0	0.326797	0	100	306		2.49421	0	1.78783	0.902871	0	0	0
32-MC4	20-21	20.5	23.7939	3.26797	0.326797	2.94118	0	0	0	0	0	0	2.28758	0	2.28758	17.3203	12.0915	0	0	33.9869	0	0	0	0	0.326797	0	5.55556	0.653595	2.28758	47.0588	0	2.94118	0	0	0	0	0	0.653595	0	100	306		1.99214	0.639475	1.8931	0	0	0	0
32-MC4	21-22	21.5	25.9511	1.4881	0.297619	3.86905	0.297619	0	0	0	0	0	0.595238	0	1.78571	9.82143	11.0119	0	0	23.2143	0	0	0	0	0.595238	0	5.35714	2.38095	1.19048	58.3333	0	2.97619	0	0	0	0	0	0	0	100	336		1.29463	0.582465	2.06215	0.582465	0	0	0
32-MC4	22-23	22.5	28.1084	1.566	0.223714	4.02685	0.223714	0	0	0	0	0	0	0	0.447427	11.4094	12.9754	0	0	24.8322	0	0	0	0	0.447427	0	6.93512	0.223714	2.68456	57.2707	0	0	0	0	0	0	0	1.566	0	100	447		1.15099	0.437988	1.82247	0.437988	0	0	0
32-MC4	23-24	23.5	30.2656	0.578035	0	6.06936	0.867052	0	0.289017	0	0	0	0.578035	0	0	8.09249	11.2717	0	0	19.9422	0	0	0	0	0.578035	0	3.75723	0	4.04624	52.3121	0	10.1156	0.867052	0	0	0	0	0.578035	0	100	346		0.798796	0	2.5159	0.976899	0	0.565655	0
32-MC4	24-25	24.5	32.4229	3.06122	0	2.1542	0.680272	0	0	0	0	0	0.340136	0.113379	0.340136	9.63719	9.29705	0	0.113379	19.8413	0	0	0	0	0.340136	0	4.98866	0.566893	1.5873	53.7415	0.113379	12.4717	0.340136	0	0.113379	0	0	0	0	100	882		1.13689	0	0.958154	0.542476	0	0	0
32-MC4	25-26	25.5	33.4492	3.19635	0	4.56621	0	0	0	0	0	0	0	0	0.456621	12.1005	10.5023	0	0.456621	23.516	0	0	0.228311	0	1.14155	0	3.42466	2.28311	2.73973	47.4886	0	11.4155	0	0	0	0	0	0	0	100	438		1.64737	0	1.95501	0	0	0	0
32-MC4	26-27	26.5	34.4756	2.32558	0	2.65781	0	0	0	0	0	0	0	0	0	9.30233	15.6146	0	0.332226	25.2492	0	0	0	0	1.66113	0	4.65116	0.332226	0.664452	57.4751	0.332226	3.65449	0.996678	0	0	0	0	0	0	100	301		1.70266	0	1.81713	0	0	0	0
32-MC4	27-28	27.5	35.5019	1.79641	0	1.39721	0.199601	0	0	0	0	0	0.399202	0	0	7.58483	10.7784	0	0	18.7625	0.199601	0	0	0	2.79441	0	5.38922	0.199601	1.59681	64.4711	0.798403	0.798403	1.59681	0	0	0	0	0	0	100	501		1.16306	0	1.02781	0.390827	0	0	0
32-MC4	28-29	28.5	36.5283	4.58167	0	2.19124	0.398406	0	0	0	0	0	0	0	0	5.17928	10.9562	0	0	16.1355	0	0	0	0	4.18327	0	4.78088	0	0.398406	60.5578	0.398406	1.99203	3.78486	0	0	0.199203	0.398406	0	0	100	502		1.82908	0	1.28067	0.551062	0	0	0
32-MC4	29-30	29.5	37.5546	7.61589	0.331126	0	0.331126	0	0	0	0	0	0	0	0.662252	9.27152	19.2053	0	0	29.1391	0.331126	0	0	0	6.62252	0	7.94702	0	0.331126	38.7417	0.331126	1.98675	6.29139	0	0	0	0	0	0	100	302		2.99166	0.647931	0	0.647931	0	0	0
32-MC4	30-31	30.5	38.581	5.30008	0	0.779423	0.233827	0	0.233827	0	0	0	0	0	0	2.10444	8.96337	0.155885	0	11.2237	0	0	0	0	7.56041	0	6.93687	1.01325	0.467654	56.1964	0.233827	1.16913	8.57366	0	0	0	0	0.0779423	0	100	1283		1.22591	0	0.481205	0.264291	0	0.264291	0
32-MC4	31-32	31.5	39.6073	4.88599	0	1.30293	0	0	0.651466	0	0	0	0	0	0	2.60586	13.0293	0	0	15.6352	0.325733	0	0	0	7.81759	0	6.18893	1.30293	0.325733	43.6482	0.325733	0.651466	16.9381	0	0	0	0	0	0	100	307		2.41149	0	1.26853	0	0	0.89994	0
																																									13767
[truncated: 28 more columns]

## Sheet: S5- Rabilimis in SWERUS
Year	Cruise	Sample		Latitude	Longitude	Water depth (m)	Location		R. mirabilis	total specimen count	% abundance
2014	SWERUS-L2	2MC4	94	72.4311	-175.346	55.7	Chukchi - Herald Trough			32	0
2014	SWERUS-L2	3MC4	94	72.3772	-175.788	89.6	Chukchi - Herald Trough			16	0
2014	SWERUS-L2	4MC4	94	72.8608	-175.711	123.6	Chukchi - Herald Trough			15	0
2014	SWERUS-L2	8MC4	94	75.1533	179.873	524	Mendeleev Ridge, S [slope]		4	18	22.2222
2014	SWERUS-L2	9MC4	94	75.0567	-179.819	446	Mendeleev Ridge, S [slope]		3	30	10
2014	SWERUS-L2	13MC4	94	76.1863	-179.278	1118	Arlis Plateau		2	138	1.44928
2014	SWERUS-L2	14MC4	94	76.3678	176.433	733	E.Siberian Sea Slope		41	59	69.4915
2014	SWERUS-L2	15MC4	94	76.3203	175.88	501	E.Siberian Sea Slope		45	110	40.9091
2014	SWERUS-L2	16MC4	94	76.5118	176.632	1023	E.Siberian Sea Slope		11	99	11.1111
2014	SWERUS-L2	18MC4	94	76.409	173.881	349	E.Siberian Sea Slope		14	80	17.5
2014	SWERUS-L2	21MC4	94	77.5823	163.294	153	E.Siberian Sea Slope		1	38	2.63158
2014	SWERUS-L2	22MC4	94	78.2238	164.421	367	E.Siberian Sea Slope		18	263	6.84411
2014	SWERUS-L2	23MC4	94	78.6644	165.033	522	E.Siberian Sea Slope		20	515	3.8835
2014	SWERUS-L2	24MC4	94	78.7969	165.366	982	E.Siberian Sea Slope			78	0
2014	SWERUS-L2	25MC4	94	79.2261	152.676	101	E.Siberian Sea Slope		2	19	10.5263
2014	SWERUS-L2	26MC4	94	79.7421	154.389	378	E.Siberian Sea Slope		1	111	0.900901
2014	SWERUS-L2	27MC5	94	79.6646	154.126	276	E.Siberian Sea Slope		6	44	13.6364
2014	SWERUS-L2	28MC4	94	79.9196	154.354	1145	E.Siberian Sea Slope			10	0
2014	SWERUS-L2	31MC4	94	79.9204	143.164	1157	Lomonosov Ridge, S			7	0
2014	SWERUS-L2	32MC4	94	85.1412	151.59	837	Lomonosov Ridge		59	864	6.8287
2014	SWERUS-L2	34MC4	94	84.276	148.713	886	Lomonosov Ridge			1063	0
